# Supplementary material for: Propanil in a Manitoba soil: an interactive spreadsheet model based on conventional chemical kinetics
Source: Royal Society of Chemistry journal article supplement (doi:10.1039/c2em10366d), 2012-01-01
Supplement: c2em10366d.zip [file 5_1.xlsx]

## Sheet: Sheet1
Model #5
PROPANIL SORPTION & REACTION KINETICS					OSBORNE CLAY: HgCl2
INPUT FOR PREDICTIONS
*	*	*
Use constants in yellow cells
for predictions
Sediment Load g/L		20
*	*	*
W	g	20
V	L	1
θC1	(mol/g)	6.16284e-07
MT = b	(mol/L)	2.5e-05
*	*	*
MODEL CALIBRATION
Volume		25 mL
Soil Mass		0.5 g
Initial Conc.		2.5 X10-5 M
Temperature		25.0 ⁰C
*	*	*
Donald S. Gamble
Dept. of Chemistry
Saint Mary's University
Residence:
7412, Route 366
Northport N. S.
Cumberland County
Nova Scotia B0L 1E0
Tel. (902) + 667 - 1974
dgamble@ns.sympatico.ca
*	*	*
W	g	20
V	L	1
θC1	(mol/g)	6.16284e-07
MT = b	(mol/L)	2.5e-05

## Sheet: Sheet2
Model #5							#				#	Model		2.08329e-05	$S$11						Model	$W$11	3.57482e-06		Model	$AA11	0		$AD$11	5.92255e-07		Experimental Data in blue.
PROPANIL SORPTION & REACTION KINETICS					OSBORNE CLAY: HgCl2		#				#	Expt.		2.08329e-05	$C$11						Expt.	$D$11	3.57483e-06		Expt.	$F11	0		$G$11	5.92255e-07		Data calculated totally or partly from					Pie, at 4 days
Donald S. Gamble			Northport N. S.				#				#	kF1		45021500	$O$11			From Solution To	In Solution		kd	$X$11	0		kd	$AB11	0		$AE$11	0.265911		Experiment 5 in green					*	*
EXPERIMENT : With Hg(II)					*	*	#	PREDICTIONS			#	MODEL						Sorption sites		|	Filled	Net Sorption		|	Bound Res.	Bound Res.	Bound Res.		Reaction Product					EXPT.	MODEL		Solution	2.96708e-06
*	*	*	*	*	Simulated using experiment		#	*	*	*	#	*	*	*	*	*	*	*	*	|	*	*	*	|	*	*	*	*	*	*	*	*	*	*	*		Sorbed	4.1179e-06
					without Hg(II)		#	Use constants in blue for			#									|			Rate Coefficient	|	Increments	Sums	Rate Coefficient	|	Formulas	Rate Coefficient	|			HgCl2	Formulas		Intra Particle	2.11407e-06
No.		In Solution	Labile Sorbed	Total Loss	Bound Res.	Product	#	predictions			#	No.	t	kF1	(a - b)(V/W)*kF1	Z1	Z2	(Z1/Z2)	M1	|	Xa1	θa1(W/V)	kB1	|	θd1(W/V)	θd1(W/V)	kd	|	θp1(W/V)	kr	|	No.		Total Loss	Total Loss		Reaction Product	1.58009e-05
	DAYS	(Mol/L)	(Mol/L)	(Mol/L)	(Mol/L)	(Mol/L)	#				#		DAYS	g/(Mol x days)				(Mol/L)	(Mol/L)	|	Mole Fraction	(Mol/L)	DAYS-1	|	(Mol/L)	(Mol/L)	DAYS-1	|	(Mol/L)	DAYS-1	|		DAYS	(Mol/L)	(Mol/L)
*	*	*	*	*	*	*	#	*	*	*	#	*	*	*	*	*	*	*	*	|	*	*	*	|	*	*	*	|	*	*	|	*	*	*	*
1	0	2.5002e-05	0	2.995e-08	0	2.995e-08	#	W	g	20	#	1	0			0	-1.26743e-05	0	2.5e-05	|	0	0	0	|	0	0		|	0	10	|	1	0	2.995e-08	0
2	0.00659722	2.08329e-05	3.57483e-06	5.92255e-07	0	5.92255e-07	#	V	L	1	#	2	0.00659722	45021500	-28.5309	-5.28683e-11	-1.47891e-05	3.57482e-06	2.08329e-05	|	0.290031	3.57482e-06	0	|	0	0	0	|	5.92255e-07	3.63415	|	2	0.00659722	5.92255e-07	5.92255e-07
3	0.0166667	1.59959e-05	7.65078e-06	1.35329e-06	0	1.35329e-06	#	θC1	(mol/g)	6.16284e-07	#	3	0.0166667	57200500	-36.2489	-1.3973e-10	-1.82635e-05	7.65077e-06	1.59959e-05	|	0.620718	7.65077e-06	0	|	0	0	0	|	1.35329e-06	3.3391	|	3	0.0166667	1.35329e-06	1.35329e-06
4	0.0569444	9.39636e-06	1.24839e-05	3.11978e-06	0	3.11978e-06	#	MT = b	(mol/L)	2.5e-05	#	4	0.0569444	44658460	-28.3008	-2.46645e-10	-2.25401e-05	1.09425e-05	9.39636e-06	|	1	1.24839e-05	2.31425	|	0	0	0	|	3.11978e-06	2.34075	|	4	0.0569444	3.11978e-06	3.11978e-06
5	0.0590278	9.38161e-06	1.24869e-05	3.13154e-06	0	3.13154e-06	#				#	5	0.0590278	44658460	-28.3008	-1.76428e-11	-9.21296e-06	1.915e-06	1.99535e-05	|	0.155367	1.915e-06	4.8432	|	0	0	0	|	3.13154e-06	2.26724	|	5	0.0590278	3.13154e-06	3.13154e-06
6	0.0892361	9.28649e-06	1.2412e-05	3.30152e-06	0	3.30152e-06	#	=	=	=	#	6	0.0892361	39971430	-25.3305	-2.76e-10	-1.95472e-05	1.41196e-05	9.50061e-06	|	0.989631	1.21979e-05	4.8432	|	0	0	0	|	3.30152e-06	1.58718	|	6	0.0892361	3.30152e-06	3.30152e-06
7	0.163542	9.1519e-06	1.21325e-05	3.71562e-06	2.99519e-07	3.4161e-06	#	(W/V)	g/L	20	#	7	0.163542	26948000	-17.0774	-2.8927e-10	-2.0078e-05	1.44073e-05	9.40938e-06	|	0.963436	1.1875e-05	1.84949	|	2.99519e-07	2.99519e-07	0.33913	|	3.4161e-06	0.910161	|	7	0.163542	3.71562e-06	3.71562e-06
8	0.195833	9.073e-06	1.20332e-05	3.8938e-06	3.54852e-07	3.53895e-06	#	*	*	*	#	8	0.195833	24937410	-15.8032	-2.94188e-10	-2.02748e-05	1.45101e-05	9.34648e-06	|	0.954084	1.17597e-05	1.53621	|	5.53329e-08	3.54852e-07	0.145342	|	3.53895e-06	0.791557	|	8	0.195833	3.8938e-06	3.8938e-06
9	0.24375	8.9568e-06	1.1887e-05	4.15622e-06	4.34725e-07	3.7215e-06	#	Laidler Equation Parameters			#	9	0.24375	20835770	-13.204	-2.95811e-10	-2.03397e-05	1.45435e-05	9.23288e-06	|	0.942009	1.16109e-05	1.21915	|	7.98728e-08	4.34725e-07	0.14314	|	3.7215e-06	0.673963	|	9	0.24375	4.15622e-06	4.15622e-06
10	0.3	8.82169e-06	1.1717e-05	4.46128e-06	5.2515e-07	3.93613e-06	#	=	=	=	#	10	0.3	19422020	-12.308	-3.00466e-10	-2.05259e-05	1.46384e-05	9.11069e-06	|	0.927173	1.1428e-05	1.02741	|	9.04247e-08	5.2515e-07	0.140101	|	3.93613e-06	0.584448	|	10	0.3	4.46128e-06	4.46128e-06
11	0.4	8.58494e-06	1.14194e-05	4.99567e-06	6.77263e-07	4.31841e-06	#	a	(mol/L)	1.23257e-05	#	11	0.4	11508076	-7.29285	-2.91475e-10	-2.01662e-05	1.44536e-05	8.83498e-06	|	0.906186	1.11694e-05	0.755987	|	1.52114e-07	6.77264e-07	0.135544	|	4.31841e-06	0.488657	|	11	0.4	4.99567e-06	4.99567e-06
12	0.5	8.35259e-06	1.11274e-05	5.51997e-06	8.18727e-07	4.70124e-06	#	b	(mol/L)	2.5e-05	#	12	0.5	8286790	-5.25147	-2.85837e-10	-1.99407e-05	1.43343e-05	8.57717e-06	|	0.884565	1.09029e-05	0.620519	|	1.41464e-07	8.18727e-07	0.129011	|	4.70124e-06	0.432377	|	12	0.5	5.51997e-06	5.51997e-06
13	0.6	8.12459e-06	1.08411e-05	6.03427e-06	9.50009e-07	5.08426e-06	#	ab	(mol/L)2	3.08142e-10	#	13	0.6	6362919	-4.03228	-2.80724e-10	-1.97362e-05	1.42238e-05	8.32676e-06	|	0.863155	1.0639e-05	0.5368	|	1.31282e-07	9.50009e-07	0.122634	|	5.08426e-06	0.395835	|	13	0.6	6.03427e-06	6.03427e-06
14	0.7	7.90089e-06	1.05604e-05	6.53868e-06	1.07156e-06	5.46712e-06	#	(a - b)	(mol/L)	-1.26743e-05	#	14	0.7	5087692	-3.22415	-2.75888e-10	-1.95427e-05	1.41171e-05	8.08272e-06	|	0.842032	1.03786e-05	0.479962	|	1.21552e-07	1.07156e-06	0.116341	|	5.46712e-06	0.370557	|	14	0.7	6.53868e-06	6.53868e-06
15	0.8	7.68146e-06	1.02853e-05	7.03328e-06	1.18382e-06	5.84945e-06	#	b2	(mol/L)	2.08329e-05	#	15	0.8	4183001	-2.65084	-2.7118e-10	-1.93544e-05	1.40112e-05	7.84444e-06	|	0.821235	1.01223e-05	0.438777	|	1.12264e-07	1.18382e-06	0.110125	|	5.84945e-06	0.352305	|	15	0.8	7.03328e-06	7.03328e-06
16	0.9	7.46626e-06	1.00156e-05	7.51817e-06	1.28722e-06	6.23095e-06	#	ab2	(mol/L)2	2.5678e-10	#	16	0.9	3509764	-2.22419	-2.66513e-10	-1.91678e-05	1.39042e-05	7.61158e-06	|	0.800788	9.87025e-06	0.407467	|	1.03396e-07	1.28722e-06	0.103973	|	6.23094e-06	0.338724	|	16	0.9	7.51817e-06	7.51816e-06
17	1.09896	7.0505e-06	9.49511e-06	8.45439e-06	1.46818e-06	6.98621e-06	#	(a - b2)	(mol/L)	-8.50725e-06	#	17	1.09896	2703852	-1.71347	-2.61265e-10	-1.89578e-05	1.37814e-05	7.17431e-06	|	0.760307	9.3713e-06	0.370857	|	1.80963e-07	1.46818e-06	0.095441	|	6.98621e-06	0.320515	|	17	1.09896	8.45439e-06	8.45439e-06
18	1.13125	6.98456e-06	9.41264e-06	8.6028e-06	1.49461e-06	7.1082e-06	#	*	*	*	#	18	1.13125	2562857	-1.62412	-2.59071e-10	-1.88701e-05	1.37292e-05	7.10161e-06	|	0.754165	9.29559e-06	0.363716	|	2.64248e-08	1.49461e-06	0.0878	|	7.1082e-06	0.318338	|	18	1.13125	8.6028e-06	8.6028e-06
19	1.19861	6.84838e-06	9.24237e-06	8.90925e-06	1.54721e-06	7.36204e-06	#				#	19	1.19861	2444199	-1.54893	-2.60007e-10	-1.89075e-05	1.37515e-05	6.96569e-06	|	0.74033	9.12507e-06	0.35989	|	5.2604e-08	1.54721e-06	0.085031	|	7.36204e-06	0.314318	|	19	1.19861	8.90925e-06	8.90925e-06
20	1.22847	6.7886e-06	9.16766e-06	9.04374e-06	1.56946e-06	7.47427e-06	#	HgCl2/θC1 =		0.0600373	#	20	1.22847	2439479	-1.54594	-2.62014e-10	-1.89878e-05	1.37991e-05	6.91005e-06	|	0.733932	9.04621e-06	0.361073	|	2.22525e-08	1.56946e-06	0.08212	|	7.47427e-06	0.312737	|	20	1.22847	9.04374e-06	9.04374e-06
21	2.22188	4.99925e-06	6.94025e-06	1.30605e-05	1.99847e-06	1.1062e-05	#		=	6.0 %	#	21	2.22188	2252649	-1.42754	-2.95222e-10	-2.03161e-05	1.45314e-05	5.25689e-06	|	0.542171	6.68262e-06	0.359157	|	4.29005e-07	1.99847e-06	0.056467	|	1.1062e-05	0.295114	|	21	2.22188	1.30605e-05	1.30605e-05
22	2.76563	4.17479e-06	5.92148e-06	1.49037e-05	2.04138e-06	1.28624e-05	#				#	22	2.76563	2131585	-1.35082	-3.00792e-10	-2.05389e-05	1.4645e-05	4.32144e-06	|	0.468521	5.77483e-06	0.343822	|	4.29058e-08	2.04138e-06	0.0127121	|	1.28624e-05	0.297049	|	22	2.76563	1.49037e-05	1.49037e-05
23	2.79722	4.13005e-06	5.86639e-06	1.50036e-05	2.0409e-06	1.29627e-05	#	Before labile site saturation			#	23	2.79722	2038579	-1.29188	-2.99837e-10	-2.05007e-05	1.46257e-05	4.27082e-06	|	0.464302	5.72284e-06	0.342676	|	2.30865e-09	2.04368e-06	0.0127121	|	1.29627e-05	0.29731	|	23	2.79722	1.50036e-05	1.50063e-05
24	2.89792	3.98976e-06	5.69372e-06	1.53165e-05	2.03754e-06	1.3279e-05	#	At labile site saturation			#	24	2.89792	2.0178e+06	-1.27871	-3.00566e-10	-2.05299e-05	1.46404e-05	4.11602e-06	|	0.450532	5.55311e-06	0.341481	|	7.2122e-09	2.0509e-06	0.0127121	|	1.328e-05	0.298263	|	24	2.89792	1.53165e-05	1.53309e-05
25	2.96528	3.89783e-06	5.58068e-06	1.55215e-05	2.0338e-06	1.34877e-05	#	After labile site saturation			#	25	2.96528	1925782	-1.2204	-2.99879e-10	-2.05024e-05	1.46265e-05	4.03081e-06	|	0.441684	5.44405e-06	0.340065	|	4.70643e-09	2.0556e-06	0.0127121	|	1.34695e-05	0.298263	|	25	2.96528	1.55215e-05	1.55251e-05
26	3.00417	3.84544e-06	5.51631e-06	1.56382e-05	2.03112e-06	1.36071e-05	#	*	*	*	#	26	3.00417	1742387	-1.10418	-2.9697e-10	-2.0386e-05	1.45673e-05	3.97828e-06	|	0.436992	5.38622e-06	0.337823	|	2.67636e-09	2.05828e-06	0.0127121	|	1.35772e-05	0.298263	|	26	3.00417	1.56382e-05	1.56355e-05
27	3.03507	3.80417e-06	5.46563e-06	1.57302e-05	2.02873e-06	1.37015e-05	#	Donald S. Gamble			#	27	3.03507	1548087	-0.981048	-2.92452e-10	-2.02053e-05	1.4474e-05	3.93341e-06	|	0.433593	5.34432e-06	0.33478	|	2.10728e-09	2.06039e-06	0.0127121	|	1.36619e-05	0.298263	|	27	3.03507	1.57302e-05	1.57223e-05
28	3.06528	3.76414e-06	5.41648e-06	1.58194e-05	2.02617e-06	1.37932e-05	#	Dept. of Chemistry			#	28	3.06528	1381867	-0.875712	-2.87105e-10	-1.99915e-05	1.43614e-05	3.88862e-06	|	0.430409	5.30508e-06	0.33127	|	2.04435e-09	2.06243e-06	0.0127121	|	1.37439e-05	0.298263	|	28	3.06528	1.58194e-05	1.58063e-05
29	3.09618	3.72349e-06	5.36659e-06	1.59099e-05	2.02334e-06	1.38866e-05	#	Saint Mary's University			#	29	3.09618	1.23838e+06	-0.78478	-2.81009e-10	-1.97476e-05	1.423e-05	3.74433e-06	|	0.435204	5.36419e-06	0.321225	|	2.09524e-09	2.06453e-06	0.0127121	|	1.3827e-05	0.298263	|	29	3.09618	1.59099e-05	1.58915e-05
30	3.12569	3.68497e-06	5.31933e-06	1.59957e-05	2.02044e-06	1.39753e-05	#	Residence:			#	30	3.12569	1.11354e+06	-0.705665	-2.74193e-10	-1.9475e-05	1.40792e-05	3.79752e-06	|	0.424349	5.23039e-06	0.322897	|	1.98708e-09	2.06651e-06	0.0127121	|	1.39056e-05	0.298263	|	30	3.12569	1.59957e-05	1.59721e-05
31	3.18924	3.603e-06	5.21883e-06	1.61782e-05	2.01355e-06	1.41646e-05	#	7412, Route 366			#	31	3.18924	1.00416e+06	-0.636353	-2.67651e-10	-1.92133e-05	1.39305e-05	3.71538e-06	|	0.417131	5.14142e-06	0.31843	|	4.18721e-09	2.0707e-06	0.0127121	|	1.40725e-05	0.298263	|	31	3.18924	1.61782e-05	1.61432e-05
32	3.75	2.93533e-06	4.40369e-06	1.7661e-05	1.92121e-06	1.57398e-05	#	Northport N. S.			#	32	3.75	907751	-0.575257	-2.72506e-10	-1.94075e-05	1.40413e-05	3.1495e-06	|	0.351479	4.33222e-06	0.318594	|	3.36463e-08	2.10435e-06	0.0127121	|	1.54139e-05	0.298263	|	32	3.75	1.7661e-05	1.75183e-05
33	3.78576	2.89605e-06	4.35595e-06	1.7748e-05	1.91377e-06	1.58342e-05	#	Cumberland County			#	33	3.78576	819515	-0.51934	-2.65001e-10	-1.91073e-05	1.38691e-05	3.10709e-06	|	0.348428	4.29461e-06	0.314566	|	1.96058e-09	2.10631e-06	0.0127121	|	1.5492e-05	0.298263	|	33	3.78576	1.7748e-05	1.75983e-05
34	3.89618	2.7772e-06	4.21168e-06	1.80111e-05	1.8899e-06	1.61212e-05	#	Nova Scotia B0L 1E0			#	34	3.89618	801103	-0.507672	-2.65511e-10	-1.91277e-05	1.3881e-05	3.00829e-06	|	0.336838	4.15176e-06	0.314553	|	5.92362e-09	2.11223e-06	0.0127121	|	1.57277e-05	0.298263	|	34	3.89618	1.80111e-05	1.78399e-05
35	3.93125	2.74021e-06	4.16683e-06	1.8093e-05	1.88206e-06	1.62109e-05	#	Tel. (902) + 667 - 1974			#	35	3.93125	717171	-0.454483	-2.56524e-10	-1.87682e-05	1.3668e-05	2.96708e-06	|	0.334091	4.1179e-06	0.309826	|	1.84292e-09	2.11407e-06	0.0127121	|	1.58009e-05	0.298263	|	35	3.93125	1.8093e-05	1.7915e-05
36	4.78958	1.94371e-06	3.20881e-06	1.98475e-05			#	dgamble@ns.sympatico.ca			#	36	4.78958	717171	-0.454483	-2.73197e-10	-1.94351e-05	1.40569e-05	1.94371e-06	|	0.256058	3.15608e-06	0.315773	|	3.94683e-08	2.15354e-06	0.0127121	|	1.77467e-05	0.313095	|	36	4.78958	1.98475e-05	1.99002e-05
37	4.82188	1.91765e-06	3.17776e-06	1.99046e-05			#				#	37	4.82188	717171	-0.454483	-2.73706e-10	-1.94555e-05	1.40683e-05	1.92313e-06	|	0.253542	3.12508e-06	0.315875	|	1.28893e-09	2.15483e-06	0.0127121	|	1.7797e-05	0.313095	|	37	4.82188	1.99046e-05	1.99518e-05
38	4.92917	1.83298e-06	3.07708e-06	2.00899e-05			#				#	38	4.92917	717171	-0.454483	-2.75345e-10	-1.9521e-05	1.4105e-05	1.85596e-06	|	0.245389	3.02459e-06	0.316163	|	4.19091e-09	2.15902e-06	0.0127121	|	1.79604e-05	0.313095	|	38	4.92917	2.00899e-05	2.01195e-05
39	5.7691	1.26735e-06	2.41296e-06	2.13197e-05			#				#	39	5.7691	717171	-0.454483	-2.85752e-10	-1.99373e-05	1.43325e-05	1.38294e-06	|	0.191821	2.36432e-06	0.31559	|	2.86164e-08	2.18764e-06	0.0127121	|	1.90651e-05	0.313095	|	39	5.7691	2.13197e-05	2.12527e-05
40	5.85833	1.21681e-06	2.35455e-06	2.14286e-05			#				#	40	5.85833	717171	-0.454483	-2.86642e-10	-1.99729e-05	1.43515e-05	1.33713e-06	|	0.187126	2.30646e-06	0.315235	|	2.64771e-09	2.19029e-06	0.0127121	|	1.91661e-05	0.313095	|	40	5.85833	2.14286e-05	2.13564e-05
41	5.93611	1.17416e-06	2.30544e-06	2.15204e-05			#				#	41	5.93611	717171	-0.454483	-2.87389e-10	-2.00028e-05	1.43674e-05	1.29776e-06	|	0.183181	2.25782e-06	0.314878	|	2.25528e-09	2.19254e-06	0.0127121	|	1.92519e-05	0.313095	|	41	5.93611	2.15204e-05	2.14444e-05
42	5.97535	1.15314e-06	2.28128e-06	2.15656e-05			#				#	42	5.97535	717171	-0.454483	-2.87755e-10	-2.00175e-05	1.43752e-05	1.27809e-06	|	0.181241	2.23391e-06	0.314681	|	1.1199e-09	2.19366e-06	0.0127121	|	1.92943e-05	0.313095	|	42	5.97535	2.15656e-05	2.1488e-05
43	6.00694	1.13644e-06	2.26213e-06	2.16014e-05			#				#	43	6.00694	717171	-0.454483	-2.88046e-10	-2.00291e-05	1.43814e-05	1.26233e-06	|	0.179703	2.21496e-06	0.314514	|	8.93304e-10	2.19455e-06	0.0127121	|	1.93282e-05	0.313095	|	43	6.00694	2.16014e-05	2.15227e-05
44	6.03889	1.11978e-06	2.24304e-06	2.16372e-05			#				#	44	6.03889	717171	-0.454483	-2.88336e-10	-2.00407e-05	1.43875e-05	1.24648e-06	|	0.17817	2.19607e-06	0.314337	|	8.95436e-10	2.19545e-06	0.0127121	|	1.9362e-05	0.313095	|	44	6.03889	2.16372e-05	2.15575e-05
45	6.13507	1.07089e-06	2.18718e-06	2.17419e-05			#	*	*	*	#	45	6.13507	717171	-0.454483	-2.89183e-10	-2.00746e-05	1.44054e-05	1.19922e-06	|	0.173688	2.14082e-06	0.31376	|	2.64964e-09	2.1981e-06	0.0127121	|	1.94619e-05	0.313095	|	45	6.13507	2.17419e-05	2.166e-05
46	6.21875	1.02991e-06	2.14054e-06	2.18296e-05			#				#	46	6.21875	717171	-0.454483	-2.8989e-10	-2.01029e-05	1.44204e-05	1.15864e-06	|	0.169947	2.09471e-06	0.3132	|	2.25159e-09	2.20035e-06	0.0127121	|	1.95463e-05	0.313095	|	46	6.21875	2.18296e-05	2.17467e-05
47	6.24757	1.01612e-06	2.12489e-06	2.1859e-05			#				#	47	6.24757	717171	-0.454483	-2.90128e-10	-2.01124e-05	1.44254e-05	1.14477e-06	|	0.168692	2.07924e-06	0.312995	|	7.64435e-10	2.20112e-06	0.0127121	|	1.95749e-05	0.313095	|	47	6.24757	2.1859e-05	2.1776e-05
48	7.02083	7.05267e-07	1.7796e-06	2.25151e-05			#				#	48	7.02083	717171	-0.454483	-2.95466e-10	-2.03259e-05	1.45364e-05	7.90236e-07	|	0.141044	1.73846e-06	0.305044	|	1.86717e-08	2.21979e-06	0.0127121	|	2.02515e-05	0.313095	|	48	7.02083	2.25151e-05	2.24713e-05
49	7.05417	6.94276e-07	1.76774e-06	2.2538e-05			#				#	49	7.05417	717171	-0.454483	-2.95656e-10	-2.03335e-05	1.45404e-05	7.75588e-07	|	0.140095	1.72677e-06	0.304594	|	7.34016e-10	2.22052e-06	0.0127121	|	2.02771e-05	0.313095	|	49	7.05417	2.2538e-05	2.24976e-05
50	7.08958	6.82802e-07	1.7554e-06	2.25618e-05			#				#	50	7.08958	717171	-0.454483	-2.95856e-10	-2.03415e-05	1.45445e-05	7.60071e-07	|	0.139109	1.71461e-06	0.304105	|	7.74515e-10	2.2213e-06	0.0127121	|	2.0304e-05	0.313095	|	50	7.08958	2.25618e-05	2.25253e-05
51	7.16285	6.59727e-07	1.7307e-06	2.26096e-05			#				#	51	7.16285	717171	-0.454483	-2.96258e-10	-2.03576e-05	1.45527e-05	7.28127e-07	|	0.137134	1.69026e-06	0.303061	|	1.58481e-09	2.22288e-06	0.0127121	|	2.03587e-05	0.313095	|	51	7.16285	2.26096e-05	2.25816e-05
52	7.23472	6.37941e-07	1.70753e-06	2.26545e-05			#				#	52	7.23472	717171	-0.454483	-2.9664e-10	-2.03728e-05	1.45606e-05	6.96982e-07	|	0.135281	1.66744e-06	0.301996	|	1.53323e-09	2.22441e-06	0.0127121	|	2.04112e-05	0.313095	|	52	7.23472	2.26545e-05	2.26356e-05
53	8.01806	4.51006e-07	1.51785e-06	2.30311e-05			#				#	53	8.01806	717171	-0.454483	-3.00085e-10	-2.05107e-05	1.46307e-05	3.68306e-07	|	0.120122	1.48059e-06	0.287809	|	1.55959e-08	2.24001e-06	0.0127121	|	2.09111e-05	0.313095	|	53	8.01806	2.30311e-05	2.31511e-05
54	8.05451	4.44378e-07	1.51158e-06	2.3044e-05			#				#	54	8.05451	717171	-0.454483	-3.00218e-10	-2.0516e-05	1.46334e-05	3.53441e-07	|	0.119621	1.47442e-06	0.287042	|	6.84608e-10	2.24069e-06	0.0127121	|	2.09314e-05	0.313095	|	54	8.05451	2.3044e-05	2.31721e-05
55	8.08785	4.38465e-07	1.50604e-06	2.30555e-05			#				#	55	8.08785	717171	-0.454483	-3.00337e-10	-2.05207e-05	1.46358e-05	3.3988e-07	|	0.119178	1.46895e-06	0.286334	|	6.23474e-10	2.24132e-06	0.0127121	|	2.09499e-05	0.313095	|	55	8.08785	2.30555e-05	2.31912e-05
56	8.18194	4.22523e-07	1.49129e-06	2.30862e-05			#				#	56	8.18194	717171	-0.454483	-3.00664e-10	-2.05338e-05	1.46424e-05	3.01761e-07	|	0.117999	1.45442e-06	0.284296	|	1.74738e-09	2.24307e-06	0.0127121	|	2.10008e-05	0.313095	|	56	8.18194	2.30862e-05	2.32438e-05
57	8.21528	4.17136e-07	1.48639e-06	2.30965e-05			#				#	57	8.21528	717171	-0.454483	-3.00776e-10	-2.05383e-05	1.46447e-05	2.88313e-07	|	0.117607	1.44959e-06	0.283561	|	6.15137e-10	2.24368e-06	0.0127121	|	2.10184e-05	0.313095	|	57	8.21528	2.30965e-05	2.32621e-05
58	12.9799	0	1.49511e-06	2.32153e-05			#				#	58	12.9799	717171	-0.454483	-3.07297e-10	-2.07991e-05	1.47745e-05	3.2056e-07	|	0.11805	1.45505e-06	0.17939	|	8.5353e-08	2.32903e-06	0.0127121	|	2.08954e-05	0.196222	|	58	12.9799	2.32153e-05	2.32244e-05
							#				#									|				|				|			|
